# Supplementary material
Source: Research Square preprint supplement (doi:10.21203/rs.3.rs-9386379/v1)
Supplement: Supplementary file 2 [file 795ca3a9ba5084cf0a35a8c7.docx]

Supplementary Table 1. Summarizes the target volume segmentation and prescribed doses.

| Target Volume | Definition | planning target volume: prescription dose |
| --- | --- | --- |
| GTVnx | Primary nasopharyngeal tumor(After induction chemotherapy: soft tissue lesions + prior bony lesions) | PTVnx: 70Gy/33Fractions |
| GTVln | Retropharyngeal lymph nodes with short-axis ≥ 5 mm;  cervical lymph nodes with short-axis ≥ 1 cm; showing central necrosis or ring enhancement (regardless of size);  ≥3 confluent nodes in high-risk areas | PTVln: 70Gy/33Fractions |
| CTV | Prophylactic area of primary tumor and lymph nodes | PTV: 54Gy/33Fractions |
